## ELS IMPAIRS vmPFC FEAR ENCODING

1

2

3

4

5

6

7

8

9

10

11 Elevated fear responses to threatening cues in rats with early life stress is associated with greater  
12 excitability and loss of gamma oscillations in ventral-medial prefrontal cortex

13

14

15

16

17

18

Florencia M Bercum, Maria J Navarro Gomez, and Michael P Saddoris\*

19

20

\*Corresponding Author Address

21

Department Psychology & Neuroscience

22

University of Colorado Boulder

23

2860 Wilderness Place

24

Boulder CO 80301

25

26

27

28

29

30

31

32

33

34

35 *Acknowledgements:* Thank you to Dr. Elizabeth West Niedringhaus for extensive help and  
36 answering all my questions about LFPs and also for providing input on an early draft of this  
37 document.

38 **Abstract**

39       Stress experienced early in development can have profound influences on developmental  
40 trajectories and ultimately behaviors in adulthood. Potent stressors during brain maturation can  
41 profoundly disrupt prefrontal cortical areas in particular, which can set the stage for prefrontal-  
42 dependent alterations in fear regulation and risk of drug abuse in adulthood. Despite these  
43 observations, few studies have investigated *in vivo* signaling in prefrontal signals in animals with  
44 a history of early life stress (ELS). Here, rats with ELS experience on PND3-5 were then tested on  
45 a conditioned suppression paradigm during adulthood. During conditioned suppression,  
46 electrophysiological recordings were made in the ventral medial prefrontal cortex (vmPFC) during  
47 presentations of a fear-associated cues that resolved both single-unit activity and local field  
48 potentials (LFPs). Relative to unstressed controls, ELS-experienced rats showed greater fear-  
49 related suppression of lever pressing. During presentations of the fear-associated cue (CS+),  
50 neurons in the vmPFC of ELS animals showed a significant increase in the probability of excitatory  
51 encoding relative to controls, and excitatory phasic responses in the ELS animals were reliably of  
52 higher magnitude than Controls. In contrast, vmPFC neurons in ELS subjects better discriminated  
53 between the shock-associated CS+ and the neutral (“safe”) CS- cue than Controls. LFPs recorded  
54 in the same locations revealed that high gamma band (65-95 Hz) oscillations were strongly  
55 potentiated in Controls during presentation of the fear-associated CS+ cue, but this potentiation  
56 was abolished in ELS subjects. Notably, no other LFP spectra differed between ELS and Controls  
57 for either the CS+ or CS-. Collectively, these data suggest that ELS experience alters the  
58 neurobehavioral functions of PFC in adulthood that are critical for processing fear regulation. As  
59 such, these alterations may also provide insight into to increased susceptibility to other PFC-  
60 dependent processes such as risk-based choice, motivation, and regulation of drug use and relapse  
61 in ELS populations.

62  
63  
64  
65

66 **Introduction**

67  
68 It is routine for individuals to experience a variety of stressors throughout their life, and  
69 the great majority are able to cope with these events and move on with minimal negative  
70 consequences on mental health. Likewise, while a large proportion of Americans routinely use  
71 psychoactive drugs recreationally, only a small proportion of these individuals will later go on to  
72 develop clinically-significant levels of drug abuse or addiction. The tipping-point between these  
73 outcomes – i.e., resumption in otherwise typical mental health outcomes, versus persistent  
74 pathologies like post-traumatic stress disorder (PTSD) or addiction – likely involves the interaction  
75 of multiple risk factors that may predispose the brain for these states. Of these, Early Life Stress  
76 (ELS) has been identified as a particularly potent risk factor due to the insults and stressors  
77 occurring during critical developmental time windows in brain maturation.

78 In human populations, ELS is a result of neglect, abuse and/or trauma experienced before  
79 the age of 18. Child Protective Services investigated 3.5 million cases of possible child  
80 maltreatment in 2018, an 8% increase from 2014 in the United States. However, estimating the  
81 prevalence of ELS is difficult as most cases are unreported. Human and animal studies refer to  
82 perinatal stress as exposure to severe and/or chronic stressors during prenatal and early postnatal  
83 life. While the definition is broad, it aims to highlight a critical period of growth, organogenesis  
84 and brain development in which the fetus or child are highly vulnerable to insult. During this  
85 period, exposure to stress during early life is associated with higher rates of chronic illness such  
86 as diabetes, obesity, cardiovascular, gastrointestinal and respiratory illness as well as autoimmune  
87 disorders (McEwen, 2003; Taylor, 2010).

88 In addition to these somatic responses, ELS can produce devastating consequences on the  
89 developing central and peripheral nervous system. Autonomic, cognitive and emotional

## ELS IMPAIRS vmPFC FEAR ENCODING

90 dysregulation are common in individuals exposed to perinatal and ELS, and underlie most forms  
91 of mental illness (Lupien et al., 2009; McEwen, 2003). The prevalence of ELS in mental illness is  
92 alarmingly high such that 50% to 64% of patients diagnosed with depression, anxiety or substance  
93 use disorders report exposure to early life adversity (Dube et al., 2003; Enoch, 2011; Vogt et al.,  
94 2016). Clinical studies have also reported a positive correlation between the intensity and duration  
95 of ELS and the number of psychopathologies an individual develops, as well as symptom severity  
96 (Carr et al., 2013). Indeed, a host of stress and anxiety disorders such as generalized anxiety  
97 disorder, panic disorder, post-traumatic stress disorder (PTSD) and obsessive-compulsive disorder  
98 have the highest rate of co-occurrence and are comorbid with substance use disorders (SUD)  
99 (Regier et al., 1990), all of which have been linked to ELS as a predictor of their development  
100 (Brady and Sinha, 2005; Brown and Barlow, 1992; Enoch, 2011; McEwen, 2003; Regier et al.,  
101 1990).

102         Apart from the differences in timing, the rodent and human brain follow similar patterns in  
103 which the sequence of structural development is highly conserved (Rice & Barone, 2000). Rodents  
104 exposed to ELS have reported morphological, neurochemical and behavioral alterations that  
105 parallel some of the findings reported in humans (McEwen, 2003; Weinstock, 2017, 2008). Unlike  
106 subcortical structures, in which early cellular processes such as migration, differentiation,  
107 synaptogenesis and gliogenesis are well underway, limbic structures such as hippocampus,  
108 amygdala and prefrontal cortex (PFC) are in their early stages of development at birth (Herlenius  
109 and Lagercrantz, 2004; VanTieghem and Tottenham, 2018). More importantly, the PFC is the last  
110 cortical structure to fully develop as it continues these processes into adulthood making the PFC  
111 highly susceptible to environmental insult throughout childhood (Kroon et al., 2019; VanTieghem  
112 and Tottenham, 2018). During the early stages of development, cortical and subcortical projections

## ELS IMPAIRS vmPFC FEAR ENCODING

113 reach the PFC to ensure proper communication between the PFC and the rest of the brain, many  
114 of which introduce neuromodulatory activity into the region. These neuromodulators play critical  
115 roles in the development of PFC circuits during the first week of postnatal life. Additionally,  
116 increased glutamatergic activity during early development dominates cortical pyramidal cell  
117 transmission and is critical in synaptogenesis as well. NMDA activity is predominant and aids in  
118 fine tuning synapses and in areas of excessive activity it enables apoptosis (Herlenius and  
119 Lagercrantz, 2004; Rice and Barone, 2000). Collectively, these limbic brain regions are  
120 interconnected, and in adulthood of neurotypical animals, coordinate activity to support  
121 appropriate responses to motivated learning and cognitive flexibility.

122 In rodents, the PFC along the medial aspect frontal regions is typically subdivided into two  
123 functional divisions, the dorsal medial aspect (*dmPFC*; which includes the prelimbic [PL] cortex)  
124 and the ventral medial aspect (*vmPFC*; including the infralimbic [IL] cortex). Though these PFC  
125 regions lack direct homology with primate regions (Laubach et al., 2018), evidence exists that  
126 functional and developmental overlap between rodent vmPFC and similar human prefrontal  
127 regions such as Brodmann's area 25. For example, this region has been implicated in cognitive  
128 and behavioral flexibility deficits in patients that suffer from Anxiety Disorders, ASD and SUD  
129 (Greenberg et al., 2013; Jackson et al., 2016; Myers-Schulz and Koenigs, 2012), as well as  
130 decreased activity during fear generalization tasks (Greenberg et al., 2013). Similar activity  
131 patterns were also detected in individuals suffering from PTSD when presented with trauma  
132 associated cues (Shin et al., 2004) and extinction recall (Milad et al., 2009).

133 In rodents, vmPFC participates in similar functions (Giustino and Maren, 2015). Via  
134 connections with limbic targets such as the amygdala complex, the IL is involved in the  
135 consolidation, maintenance and expression of extinction learning as well as habitual behaviors

## ELS IMPAIRS vmPFC FEAR ENCODING

136 (Quirk and Mueller, 2008). Within the domain of fear conditioning specifically, IL activity is both  
137 necessary and sufficient to support fear extinction. Stimulation of IL accelerates fear extinction  
138 (Adhikari et al., 2015; Bukalo et al., 2021; Milad and Quirk, 2002) and suppresses spontaneous  
139 recovery of fear (Kim et al., 2010), while neurons in this area increase activity during the early  
140 stages of extinction learning, with cue-elicited phasic activity emerging only after extinction  
141 learning has occurred (Sierra-Mercado et al., 2011a). Conversely, pharmacological or optical  
142 silencing of this IL pathway in fear extinction learning results in increased freezing behavior and  
143 reduced extinction rates (Adhikari et al., 2015; Gutman et al., 2017; Laurent and Westbrook,  
144 2009).

145         However, ELS appears to alter these normal fear and anxiety-related processes, disrupting  
146 conditioned fear as well as decreasing exploration of open arms in an elevated plus maze (Nisar et  
147 al., 2019; Oldham Green et al., 2021; Toda et al., 2014). While recent work has provided valuable  
148 insight into the genetic and epigenetic bases for these differences particularly in the PFC (Oldham  
149 Green et al., 2021; Torres-Berrío et al., 2019), less is known about how mature neurons in ELS-  
150 experienced animals encode information about threat and safety during behavior. Using a variant  
151 of a limited bedding model of ELS (Molet et al., 2014; Walker et al., 2017), we recorded from  
152 animals who received either the ELS or Controls who were allowed to develop without stress  
153 during a conditioned suppression task. Unlike standard fear conditioning, in conditioned  
154 suppression tasks, rats decide whether to withhold motivated seeking (pressing for rewards) in the  
155 presence of threatening cues (such as shock-associated tone), producing a behavioral conflict  
156 between desire for rewards and passive defensive behaviors which would prevent seeking those  
157 goals. Here we report that ELS animals showed greater fear-suppressed motivation than Controls,

## ELS IMPAIRS vmPFC FEAR ENCODING

158 and that during this task, vmPFC neurons displayed greater excitatory responding to fear cues, but  
159 decreased high gamma oscillations in the local field potential band.

### 160 **Methods**

#### 161 **Subjects**

162 Subjects for this experiment were initially 26 male and female Long-Evans rats (9 male  
163 and 17 female) at the start of the experiment. All animals were bred in-house in the CU Boulder  
164 vivarium in an AAALAC-approved facility. Subjects were bred against a TH::Cre background  
165 (males were TH::Cre-positive Long-Evans [original line sourced from Rat Resource & Research  
166 Center (RRRC)] mated with female standard non-transgenic Long-Evans [Envigo]), though we  
167 did not use manipulations to selectively target TH-containing cells in this study, so cre status was  
168 not assessed in this study in group assignments. All rats were bred in-house and maintained on a  
169 12:12 light/dark cycle (lights on 7:00 A.M.–7:00 P.M.) and all testing occurred during the light  
170 phase.

171 The behavioral procedures occurred in two distinct periods. During the first (“early life”)  
172 phase of the experiment (PND 0 - PND 21), dams were allowed *ad libitum* access to enriched  
173 breeder chow (Teklad) and water in the home cage, while pups were allowed *ad libitum* access to  
174 nursing. During the second (“adulthood”) period for the original pups, rats were first tested under  
175 *ad libitum* conditions (PND180), and afterwards (approximately PND 180-PND 320) restricted to  
176 95% of their free feed weight receiving 10-15g of standard laboratory chow (Teklad) provided  
177 directly in their home cage after daily test sessions. Note that while developmental assays reflected  
178 all subjects described, due to an animal care error, all but three of the males in this study were  
179 sacrificed just prior to reaching adulthood and subsequent testing.

## ELS IMPAIRS vmPFC FEAR ENCODING

180           During the pre-weaning period (PND 0-PND 21), the dam and pups were housed in a  
181 plastic container (48cm (l) X 26cm (w) X 20cm (h)) with approximately 2cm of wood shaving  
182 bedding and a laboratory paper twists for enrichment and nesting material. For the remainder of  
183 the experiment the home cage consisted of a plastic container (48cm (l) X 26cm (w) X 20cm (h))  
184 with approximately 2cm of bedding. All procedures were performed in accordance with University  
185 of Colorado Institutional Animal Care and Use Committee guidelines for the humane use of  
186 laboratory rats in biological research.

187

### 188 **Behavior**

#### 189 *Early life stress (wet bedding and nesting material)*

190           Breeding pairs of rats were originally intended to be used for a different study involving  
191 TH::cre lines. Four male/female pairs were created on the same day, and after mating, pregnant  
192 females were isolated to gestate without males present. All females used in this study were new to  
193 the colony after arrival from the vendor, and as such, the resulting litters were born to first-time  
194 dams. Of the four cages, two suffered a water supply malfunction (Hydropac Alternative Watering  
195 System), in which both thin-plastic hydropacs that provided water to the dam leaked and flooded  
196 the cages, resulted in exposure to wet and cool bedding (2 cm) and nesting material for the dam  
197 and pups for approximately 24-72hrs (PND 2-PND 5). On PND 5, the dam and their pups were  
198 returned to normal bedding conditions. In the other two cages, dams produced pups that were left  
199 undisturbed with normal bedding and nesting conditions throughout development. Based on these  
200 conditions, we were unsure whether this wet/cold setting early in life might alter aspects of brain  
201 development. As such, pups who experienced the wet/cold cage were designated the Early Life  
202 Stress (ELS) group, while the non-stressed pups born at the same time in the vivarium (within one



## ELS IMPAIRS vmPFC FEAR ENCODING

203 week) comprised the Control group. Animals were pair-housed during the post-weaning period  
204 into adulthood, and were only separated following intracranial implants just prior to Conditioned  
205 Suppression training (see below)

206

### 207 *Early Life: Juvenile Social Exploration*

208 Social exploration tests were conducted at PND 180 as described previously (Christianson  
209 et al., 2011). For this test, each subject was placed in plastic tub cage (48cm X 26cm X 20cm) that  
210 contained 2 cm of fresh bedding located in a designated testing room for a 1-hour habituation  
211 period. A novel Long-Evans juvenile rat (target) was then introduced into the cage for 3 min. The  
212 behavioral response of the subject animals (ELS/Controls) to the target juvenile was recorded with  
213 a video camera placed above the cage. The behavior was then assessed by measuring total duration  
214 and frequency of social exploration. All videos were scored in a blinded and randomized manner.

### 215 *Adulthood: Conditioned Suppression*

216 As adults, rats were trained in a Conditioned Suppression paradigm. This task consisted of  
217 a sequence of three phases: instrumental conditioning [Context A], auditory fear conditioning  
218 [Context B], and finally, fear-conditioned suppression test [Context A]. The specific approaches  
219 are explained in detail below.

220 Instrumental Conditioning: Lever press was established to assess motivation to seek  
221 rewards. On the first day of training, rats (n=16) were introduced to a large operant chamber  
222 (Context A: 60cm (w) X 56cm (l) X 36cm (h), smooth Plexiglas floors; MED Associates) where  
223 they were first magazine trained to obtain food (45mg raspberry-flavored grain pellets, Purina Test  
224 Diet) randomly delivered to a centrally-located foodcup on average about every 60s schedule.

## ELS IMPAIRS vmPFC FEAR ENCODING

225           On the subsequent days, a lever was extended and rats could press the lever and obtain  
226 food. Each session ended when the rat pressed the lever enough times to deliver 25 pellets or  
227 30min, whichever occurred first. If a rat received the 25 pellets within the 30min session limit, on  
228 the following day, the subject was promoted to the next reinforcement schedule. Rats were first  
229 trained on an FR1 schedule of reinforcement (each press produces a pellet), followed by variable  
230 interval schedules of VI-5 (i.e., the first press in each 5-sec bin reinforced), then VI-15, VI-30 and  
231 finally VI-60. Following completion of the VI-60 schedule, rats were implanted with bilateral  
232 electrophysiological arrays (see below), then allowed at least 7d to recover. Following recovery,  
233 rats were retested in the VI-60 schedule to re-establish stable pressing behavior. For rats who failed  
234 to perform adequately at the VI-60 schedule, retraining at denser reinforcement schedules until  
235 they could once again advance to stable completion of the VI-60 schedule over three consecutive  
236 days.

237           Fear Conditioning: On the day following completion of the last VI-60 schedule of pressing,  
238 rats were trained in a standard tone-shock fear conditioning paradigm consisted of a single 49-min  
239 session. In this task, subjects were tested in a novel chamber (Context B: 43cm X 43cm X 53cm,  
240 stainless steel grid floor; MED Associates) that was located in a different location in the research  
241 facility from the original Instrumental Context A. The first 5 min of the session consisted of a  
242 habituation phase where no cues were presented followed by a randomized presentation of a total  
243 of 14 trials with a 180s ITI (7 CS+ trials: 30s tone (5000Hz, 80dB) co-terminating with a 0.8mA  
244 footshock delivered through the stainless floor grid bars, and 7 CS- trials: 30s tone (3000 Hz,  
245 80dB) presented without any programmed consequences).

246           Conditioned Suppression: The day after Fear Conditioning training, test subjects were  
247 returned to the original Instrumental Context A chamber. As in prior instrumental testing sessions,

## ELS IMPAIRS vmPFC FEAR ENCODING

248 a lever was presented and presses were reinforced with 45mg pellets on a VI-60 schedule. However  
249 in the Conditioned Suppression sessions, after an initial 5min habituation phase where no cues  
250 were presented, rats received random presentations of either the previously shock-predictive CS+  
251 cue (30s high tone; 5000 Hz, 80dB; n=7 presentations) or the neutral CS- cue (30s low tone;  
252 3000Hz, 80dB; n=8 presentations). Note that in this Context A, auditory cues were presented  
253 without shock under extinction conditions. Cues were presented with an ISI on average of 150s  
254 throughout the session. The number of lever presses during baseline period (no cues present) was  
255 compared to pressing during both the CS+ and CS- period to assess the degree of cue-elicited  
256 suppression of instrumental activity. Rats received three consecutive Conditioned Suppression  
257 sessions to assess the rate of recovery of instrumental pressing with extinction of the fear response.

258

### 259 **Electrophysiological Recording**

260 Single-unit recordings were acquired during Conditioned Suppression test sessions. Using  
261 Plexon Omniplex systems (Plexon, Dallas TX) with a sampling rate of 40 kHz, analog voltages  
262 recorded at the site of wires relative to a ground wire were amplified with a unity gain head  
263 stage. Neural activity was then digitized and low-pass filtered to remove artifacts through a Plexon  
264 MiniDigiAmp A/D converter and collected with the OmniPlex Server on a wideband spectrum.  
265 This signal was then passed through a high-pass filter to capture unit spikes, while a low-pass filter  
266 captured local field potentials (LFPs). OmniPlex received synchronized TTL inputs from the MED  
267 Associates system running the test chambers to capture real-time behavioral events (including  
268 experimenter-delivered events like cues and reward delivery, and subject-generated inputs like  
269 lever presses), allowing perievent analysis of neural activity and LFP power.

270

271 **Surgery**

272 *Electrophysiological Recordings*

273 A subset of subjects (n = 13 rats; 10 female, 3 male) underwent bilateral electrode  
274 implantation surgery (n= 7 ELS [6F/1M], 6 CTL [4F/2M]). Stereotaxic surgery was performed  
275 under isoflurane anesthesia (2–5%) using aseptic techniques. For each surgery, rats were secured  
276 in a stereotaxic apparatus (Kopf) using blunt earbars. Hair on the scalp was removed and the  
277 underlying skin scrubbed with two sets of alternating washes of Betadine scrub and 70% ethanol.  
278 Optical ointment (Vaseline) was applied gently to protect the eyes. A midline incision was made  
279 with a scalpel, and the scalp and underlying fascia retracted laterally, which was then secured with  
280 hemostats clamped to the fascia. The locations of Bregma and lambda were marked with a Pilot  
281 Precise V5 pen. A probe attached to the stereotaxic was used to measure the DV and ML deviations  
282 of Bregma and lambda; deviations of more than 0.1mm were adjusted until the head was level.  
283 Coordinates for array implants were generated from an atlas from Paxinos and Watson (2004) for  
284 infralimbic cortex (AP, +2.7; ML,  $\pm 0.5$ ), and then holes drilled using a dental burr over the  
285 location. At each of these insertion sites, the underlying dura was retracted to ensure the wires  
286 were inserted directly into brain tissue. In addition, holes were drilled for skull screws (typically  
287 three on each hemisphere) and the location of the ground wire (one each hemisphere).

288 Once holes were drilled, the skull screws were inserted. After this, each array was inserted  
289 (AP, +2.7; ML,  $\pm 0.5$ ; DV,  $-5.0$  mm), with the left inserted first. Arrays consisted of two 8-wire  
290 electrode arrays (circular array surrounding an optical fiber; each wire consisting of a 50- $\mu$ m dia  
291 Teflon-coated stainless-steel wire spaced 500  $\mu$ m apart; NM Labs, Denison, TX). Arrays were  
292 lowered slowly (approximately 0.5mm/min) to the final recording location where the insertion  
293 hole and wires were secured with a light application of dental acrylic. After this, the ground wire

## ELS IMPAIRS vmPFC FEAR ENCODING

294 was wrapped around the posterior skull screw, then inserted into the brain at the ground wire hole.  
295 The ground wire was then secured with an application of dental acrylic at the insertion site. Prior  
296 to use, array wires are kept in alignment between the base of the connector (Omnetics micro) to  
297 near the wire tips with polyethylene glycol (PEG); once inserted, a gentle sterile saline wash was  
298 used to dissolve the PEG substrate away from the wires. Once dissolved, the flex array was gently  
299 lowered to as to coil the remaining wire, and then secured with dental acrylic. This was then  
300 repeated on the right side, with a specific mount used to ensure the two array connectors were  
301 spaced correctly for the headstage tethers that would be used later on the recording rigs. Rats  
302 received intramuscular injections of the antibiotic Baytril and the NSAID analgesic Meloxicam-  
303 SR at the end of surgery. Rats were given a 7-day post-surgery recovery period before conditioned  
304 suppression training began.

305

306

### 307 *Perfusion and Histology*

308 Following the final behavioral test, rats were deeply anesthetized using isoflurane 4% and  
309 transcardially perfused with 0.9% saline followed by 4% paraformaldehyde. Electrode placements  
310 were marked by passing current from a 9V battery through each electrode wire. Brains were  
311 postfixed in 4% paraformaldehyde for at least 12h, followed by 36-48h in 20% sucrose as a  
312 cryoprotectant, then stored at  $-80^{\circ}\text{C}$ . Tissue was sectioned at  $20\ \mu\text{m}$  and mounted onto SuperFrost  
313 Plus slides (Fisher Scientific) using a cryostat at  $-20^{\circ}\text{C}$  and imaged using a light microscope  
314 (Leica) to confirm electrode placement.

315

### 316 **Data Analysis**

317 *Behavioral Analysis*

## ELS IMPAIRS vmPFC FEAR ENCODING

318 During Early Life, behavior was assessed for pup weight, ultrasonic vocalizations, and  
319 juvenile social exploration. These data were analyzed with a between-subjects (unpaired) t-test  
320 using ELS and unstressed Controls as the factors of interest.

321 During Adulthood, behavior for Conditioned Suppression was measured by using a  
322 suppression ratio. Presses made during the 30-sec cue presentation (CS) was compared the 30-sec  
323 period immediately prior to the cue onset (BL). The suppression ratio for each stimulus type (i.e.,  
324 CS+ or CS-) was calculated as:

$$325 \quad \text{Suppression Ratio} = \frac{(CS - BL)}{(CS + BL)}$$

326 This produces a range of scores from -1 to +1, with -1 being total suppression of pressing during  
327 the cue and 0 reflecting no difference in pressing during the cue relative to the baseline.  
328 Differences between groups for behavioral suppression were determined using two-way ANOVA  
329 using the factors of Day (Days 1-3) and Stress (ELS vs unstressed Controls) as the variables of  
330 interest. Tukey's HSD test was used for post hoc comparisons.

331

### 332 *Single Unit Electrophysiological Analysis*

333 Putative single units were sorted for each channel (wire) using principal component  
334 analysis clusters based on waveform similarity (Offline Sorter; Plexon). Unit clusters were then  
335 subject to secondary confirmation using auto-correlated firing properties. Auto-correlated firing  
336 histograms typically contain a "notch" at the 0 point indicative of a biologically-relevant refractory  
337 period for action potential generation (typically at least +/- 4 ms) Putative cells that showed  
338 significant numbers of spike events in this refractory period were rejected as units as being  
339 biologically implausible, and were not subsequently analyzed.

## ELS IMPAIRS vmPFC FEAR ENCODING

340 For perievent analysis, data were binned into 200ms blocks and averaged across events  
341 within a session. The perievent firing rate was then z-transformed based on mean and standard  
342 deviation of the average perievent activity. Thus, the z-normalized firing rate for each bin was  
343 calculated as:

$$344 \quad z_{Bin} = \frac{(FiringRate_{Bin} - Mean\ BL\ Firing\ Rate)}{StDev\ BL\ Firing\ Rate}$$

345 To ensure relatively uniform distributions of z-normalized firing, units with activity of less  
346 than 0.5Hz were excluded from subsequent analysis. Within the remaining units, averaged  
347 populations were grouped by generally excitatory (firing rate greater than 0.5z within 1s after cue  
348 onset) or generally inhibitory (firing less than -0.5z within 2s after cue onset). Based on this, we  
349 assessed two components of perievent cue firing. The first is the relative proportion of cells that  
350 exhibited generally excitatory (>0.5z), generally inhibitory (< -0.5z) or non-phasic relative to cue  
351 onset. These proportions were compared using chi square analysis. The second quantifies the peak  
352 firing during these onset periods for each cell. These were assessed using three-way ANOVAs  
353 with Stress (CTL vs ELS), Cue (CS+ vs CS-) and Epoch (Baseline vs Cue Onset) as factors.

354

### 355 *Local Field Potential Analysis*

356 LFP data generated spectrograms from 1-120 Hz perievent aligned to the CS+ and CS-  
357 cues. Spectrograms included a 5sec baseline followed by a 30s cue presentation and a 5-sec post-  
358 cue period, averaged into 200ms bins. Prior to fast Fourier transform (FFT), spectrograms were  
359 mean background subtracted, then normalized by the log of the Power Spectral Density (dB). From  
360 these spectrograms, specific frequencies were selected based on their established importance in  
361 circuit signaling: Delta (1-4 Hz), Low Theta (5-8 Hz), High Theta (9-14 Hz), Beta (15-22 Hz),  
362 Low Gamma (23-55 Hz), and High Gamma (65-95 Hz). The average power in these bands were

## ELS IMPAIRS vmPFC FEAR ENCODING

363 then z-normalized by the average and standard deviation of the 5sec baseline period prior to cue  
364 onset, then applied to each 200ms bin throughout the perievent trace (similar to that described  
365 above for neural activity normalization).

366 For stress-related comparisons, for each spectrum, the subject's baseline and average  
367 power during the cues (CS+ and CS-) was assessed separately for all days of the Conditioned  
368 Suppression tasks. Note that the averaged power during the cue period excluded the first 400ms  
369 of activity, but did include the rest of the cue period. These were assessed using three-way  
370 ANOVAs with Stress (CTL vs ELS), Cue (CS+ vs CS-) and Epoch (Baseline vs Cue Onset) as  
371 factors.

372

373

### 374 **Results**

#### 375 **Behavior**

376

##### 377 *Early Life Stress Impairs Development*

378

379 Pups were weighed six days following birth (PND6). We found that stress had a significant  
380 negative impact on weight gain, with animals in the ELS group showing reliably lower weights  
381 than Controls,  $t_{24} = 15.85$ ,  $p < 0.0001$  (Figure 1A).

382

##### 383 *ELS Reduces Social Behaviors*

384 After growing to adulthood in the vivarium (but prior to any experimental conditioning), adult  
385 rats were assessed in a juvenile social interaction (JSI) task on PND180 to assess social  
386 behaviors and anxiety-related phenotypes. Rats in the ELS group generally showed a decrease in  
387 social behaviors compared to Controls. While the total time spent sniffing the juvenile



## ELS IMPAIRS vmPFC FEAR ENCODING

388 conspecific was marginally decreased in the ELS group ( $t_7 = 2.32, p=0.052$ ; Figure 1B, left), the  
389 number of interaction bouts initiated by the ELS subjects were significantly lower than  
390 unstressed Controls,  $t_7 = 3.14, p=0.017$ ; Figure 1B, right).

391 -----  
392 **Figure 1 about here**  
393 -----

### 394 *ELS Abnormally Suppresses Motivated Seeking Under Threat*

395 In the acquisition phase of instrumental learning, ELS appeared to have no effect on the  
396 motivation to press for food. Rats in the ELS group showed a similar ability as Controls on the last  
397 three days of each schedule to press for the food, and likewise to increase the number of presses  
398 per reward delivered based on the schedule requirements (Figure 1C). These observations  
399 produced a significant main effect of Schedule,  $F_{2,223} = 200.7, p < 0.001$ . This effect was almost  
400 exclusively due to a linear increase in press rate per reward earned across the decreasing  
401 reinforcement schedule, as a linear contrast on these data was significant,  $F_{1,223} = 274.1, p < 0.001$   
402 and accounted for 82% of the main effect variance. However, there were no effects of Stress or  
403 any interactions of Stress by any other factor (Schedule, Day) (all  $F < 1$ ).

404 Following this, rats were returned to the original context for the Conditioned Suppression  
405 task. Here, rats were reinforced on a VI60 schedule while receiving presentations of the CS+ (fear-  
406 associated cue; n=8) or neutral CS- (n=8). Because no shocks were delivered in this context, we  
407 repeated this Suppression paradigm for three consecutive days to assess the rate of fear extinction.  
408 For average pressing within each session, both groups showed suppression of lever presses during  
409 the presentation of the CS+, though ELS subjects were more suppressed than Controls (main effect  
410 Stress,  $F_{1,16} = 5.21, p=0.047$ ; Figure 1D). This suppressive effect in the ELS animals was limited  
411 to the CS+ (interaction of Stress X Cue,  $F_{1,16} = 10.54, p=0.005$ ), with ELS showing reliably greater

## ELS IMPAIRS vmPFC FEAR ENCODING

412 suppression than controls during the CS+ (Tukey,  $p=0.005$ ), but no differences between the CS-  
413 (Tukey,  $p=0.99$ ).

414 Finally, we assessed the degree of successful extinction by assessing whether the  
415 suppression ratio was reliably negative (i.e., still suppressed) on each session. Controlling for  
416 multiple comparisons (Bonferroni), we found that in Controls, suppression for the CS+ was  
417 reliably below 0 on Day 1 ( $p<0.001$ ), but not on Day 2 or Day 3. In contrast, ELS rats showed  
418 suppression during the CS+ that was reliably below 0 on all three days (Day 1:  $p<0.0001$ ; Day 2:  
419  $p=0.005$ ; Day 3:  $p=0.01$ ). Overall, these data indicate that relative to Controls, ELS animals display  
420 greater suppression of motivated behavior to fear-related stimuli that is more resistant to extinction  
421 than in Controls. However, ELS rats do not appear to show generalized fear, as they are adept at  
422 discriminating between fearful and “safe” stimuli; indeed, even better than Controls.

423  
424 *ELS increases the rate of excitatory responses to fear cues in vmPFC neurons*

425 Recordings of single unit activity were conducted during Conditioned Suppression in both  
426 Controls ( $n=6$ ) and ELS ( $n=7$ ) subjects. From these recordings, we identified  $n=129$  neural units  
427 in the Controls and  $n=191$  in the ELS subjects in histologically-confirmed locations in the vmPFC  
428 (Figure 2).

429

430

431

432

-----  
**Figure 2 about here**  
-----

433

434 Z-normalized firing rates were then aligned by their phasic response to the onset of the  
435 fear-associated cues (CS+ and CS-) by taking the average Z score during the first 1sec following  
436 cue onset. Data were considered generally excitatory if they exhibited an increase in firing greater

## ELS IMPAIRS vmPFC FEAR ENCODING

437 than +0.5z relative to baseline, while inhibitions were those with a phasic response less than -0.5z.  
438 Data from all recorded cells relative to CS+ onset are shown in Figure 3A (Control) and Figure 3B  
439 (ELS). Population responses to the CS+ cue in the Controls were biased towards inhibitory  
440 signaling with 36.7% of cells demonstrating phasic inhibitions and 28.9% displaying excitations;  
441 34.3% of cells were non-phasic in either direction. In contrast, ELS neurons showed the opposite  
442 pattern, as these units were almost twice as likely to display an excitatory response (50.5%) than  
443 an inhibitory response (25.5%) to the CS+ cue. ELS neurons also had slightly fewer cells that were  
444 non-phasic (24.0%). This shift from inhibitory to excitatory response to the CS+ between groups  
445 was significantly different,  $\chi^2_1 = 10.96$ ,  $p = 0.0009$  (Figure 3B). Notably, these EXC/INH/non  
446 proportions were quite stable by groups over days, with Controls showing generally more  
447 inhibitory responses than excitations to the CS+, and ELS showing the opposite pattern (*Controls*:  
448 Day 1 - 29% EXC, 35% INH; Day 2 – 32% EXC, 53% INH; Day 3 – 33% EXC, 27% INH; *ELS*:  
449 Day 1 - 56% EXC, 20% INH; Day 2 – 48% EXC, 31% INH; Day 3 – 40% EXC, 21% INH; all  $\chi^2$   
450 comparisons between day,  $p > 0.20$ ). In contrast to the fear-associated CS+, the relative proportion  
451 of excitatory and inhibitory response to the CS- cues was not different between groups (Control:  
452 29.2% excitatory vs 32.1% inhibitory; ELS: 41.7% excitatory vs 34.9% inhibitory;  $\chi^2_1 = 0.57$ ,  $p =$   
453 0.45). These data suggest that ELS experience alters the function of the vmPFC to bias neurons  
454 towards an abnormally excitatory response to threatening (but not neutral, or “safe”) cues.

455 -----  
456 **Figure 3 about here**  
457 -----

458  
459 *ELS impairs normal shifts in extinction-related firing to the CS+ cue*

460 Prior investigations have reliably demonstrated that vmPFC neurons are critical for  
461 mediating extinction of fear via connectivity with amygdalar structures (Adhikari et al., 2015;

## ELS IMPAIRS vmPFC FEAR ENCODING

462 Maren and Quirk, 2004; Milad and Quirk, 2002; Sierra-Mercado et al., 2011b). Phasic perievent  
463 excitatory activity relative to the CS+ in the Controls was consistent with this established  
464 finding, demonstrating a slight increase in the magnitude of phasic activity over days. In  
465 contrast, vmPFC neurons in ELS animals showed the opposite pattern, with the greatest level of  
466 excitatory activity during the CS+ occurring on the first day and decreasing magnitude of this  
467 response over repeated days of extinction (Figure 4A). In general, the ELS animals showed a  
468 reliably higher overall excitatory phasic response to the fear cues (main effect Stress,  $F_{1,133} =$   
469  $4.77=8, p = 0.03$ ) and an interaction of Cue (CS+ vs CS-) X Stress (ELS vs Control) X  
470 Extinction Day (1-3),  $F_{2,133} = 3.34, p = 0.04$ . This interaction showed that the phasic response to  
471 the CS+ was greater in ELS than Controls on Day 1 ( $p = 0.005$ ) but not on subsequent days.  
472 There were no differences to the CS- between groups on any day (Figure 4B). However, in  
473 general, CS+ elicited significantly greater activity than the CS- in both the Controls ( $p = 0.02$ )  
474 and in the ELS group ( $p < 0.001$ ).

475 In contrast to the excitatory phasic responses, for inhibitory responses, there were no  
476 stress-related main effect,  $F_{1,104} = 3.07, p = 0.08$ , though there was an interaction of Stress X  
477 Day,  $F_{2,104} = 3.18, p = 0.046$ , and Stress X Cue,  $F_{1,104} = 5.90, p = 0.017$ , but not Stress X Cue X  
478 Day,  $F_{2,104} = 0.75, p = 0.47$  (Figure 4C). Indeed, for planned comparisons, we found no  
479 differences in the magnitude of the inhibitory response between Controls and ELS for the CS+  
480 cues (all  $p > 0.28$ ), though there were differences between ELS and Controls for the “safe” CS-  
481 on Day 1 ( $p < 0.001$ ) and on Day 2 ( $p = 0.04$ ), but not on Day 3 ( $p = 0.75$ ). On those same days,  
482 ELS animals showed a better ability to discriminate neural firing responses between the CS+ and  
483 CS- on Day 1 ( $p = 0.005$ ), Day 2 ( $p = 0.001$ ) and Day 3 ( $p < 0.001$ ), whereas Controls only

484 successfully discriminated between CS+ and CS- cues on Day 3 ( $p = 0.01$ ) but not on Day 1 ( $p =$   
485 0.75) or Day 2 ( $p = 0.76$ ), Figure 4D.

486 -----  
487 **Figure 4 about here**  
488 -----

489 *ELS abolishes High Gamma LFP responses to threat cues in vmPFC*

490 LFPs have been proposed to reflect the coherence of the aggregate voltage in a region.  
491 Given the large amount of surface area on dendritic arbors in a region relative to somatic  
492 activity, one potential interpretation of LFP oscillations is that it reflects a significant component  
493 of input to those local arbors from afferent regions. We recorded LFPs on the same wires and  
494 locations in the vmPFC as for the single-unit activity described above, and generated perievent  
495 spectrographs for defined frequency bands relative to CS+ and CS- onset during the same  
496 Conditioned Suppression sessions (West et al., 2021).

497 We found that ELS experience had little effect on changes in LFPs in most spectra  
498 (Figure 5). For example, in the Delta, Beta and Low Gamma frequencies, the response to the cue  
499 onset reliably decreased the power of these frequencies relative to baseline for the CS+ but not  
500 CS- (Cue [CS+ vs CS-] X Onset [baseline vs cue periods]: Delta,  $F_{1,53} = 14.52$ ,  $p = 0.0004$ ; Beta,  
501  $F_{1,53} = 8.90$ ,  $p = 0.004$ ; Low Gamma,  $F_{1,53} = 11.66$ ,  $p = 0.001$ ). However, while the LFP  
502 response to the CS+ decreased LFP power in these spectra below baseline for the CS+ (all  
503  $p < 0.003$ ) but not CS-, there were no differences between Controls or ELS for either CS+ or CS-  
504 in any of these spectra (all  $p > 0.25$ ). Notably, there were no main effects of Stress or interactions  
505 of Stress with other factors in the Delta, Low Theta, High Theta, Beta, or Low Gamma  
506 frequencies.



## ELS IMPAIRS vmPFC FEAR ENCODING

531 Fear is an adaptive response to potentially threatening stimuli, though the brain must be  
532 adaptive enough that fear can extinguish when threats are no longer present. Consistent with  
533 prior observations, we found that ELS experience increases the fear-related suppression of  
534 reward seeking during the fear-associated CS+ compared to Controls. However, ELS animals did  
535 not differ from controls in their responses to the “safe” CS- cue. During these conditioned  
536 suppression sessions, recordings were made in the vmPFC that permitted the recording of both  
537 single unit and LFP activity in the same location. Neurons in the vmPFC of ELS rats showed  
538 both an increase in the proportion of excitatory responses to the fear-associated CS+ cue  
539 compared to Controls, as well as an increase in overall magnitude of the excitatory phasic  
540 response to cue. In contrast, while there were no differences between ELS and Controls in  
541 inhibitory encoding of the CS+, ELS neurons were better able to discriminate between CS+ and  
542 CS- stimuli than those in Controls. Finally, LFP oscillations in the vmPFC were consistent with a  
543 selective loss of the high gamma band in ELS-experienced rats. This loss is notable in that this is  
544 the only frequency where Controls showed a phasic change in activity that discriminated  
545 between CS+ and CS- stimuli, suggesting this signal plays a potentially important role in  
546 facilitating fear discrimination and feedback during extinction. Collectively, these data are  
547 among the first to demonstrate ELS-related functional alterations in vmPFC activity and resultant  
548 changes in fear-related behavior.

549 In general, our finding in Controls are congruent with prior findings in neurotypical adult  
550 rats undergoing fear conditioning and extinction. Controls showed initial fear to the CS+  
551 stimulus that resulted in a robust cessation of motivated pressing for food. However, these fear-  
552 suppressed behaviors rapidly returned to pre-suppression levels by the second day of extinction.  
553 In these same Control subjects, vmPFC activity showed an appreciable increase in phasic

## ELS IMPAIRS vmPFC FEAR ENCODING

554 excitatory activity in response to the CS+ commensurate with the resumption in motivated  
555 seeking behavior and extinction of the fear-related suppression, while showing reliably less  
556 activity to the safer CS- cue. These data are consistent with prior work demonstrating the role of  
557 IL and the vmPFC in mediating extinction through new learning (i.e., that the CS+ is now  
558 associated with no-shock), and increases in excitatory activity in these regions to permit this  
559 plasticity. Prior work, for example, has shown that excitatory stimulation of IL via electrical  
560 current or channelrhodopsin is sufficient to expedite fear suppression and extinction (Adhikari et  
561 al., 2015; Giustino and Maren, 2015; Milad and Quirk, 2002), and which persists in subsequent  
562 days without the stimulation present.

563         The ELS animals showed a different pattern of results; unlike Controls, ELS animals  
564 showed greater overall amounts of fear suppression, while at the same time showing increased  
565 levels of excitatory responding in single units. It is essential to note that ELS animals face  
566 developmental alterations compared to unstressed neurotypical controls. For example, PFC  
567 regions continue to develop and integrate neuromodulatory afferents for several days (at least  
568 PND16) after birth, including mesocortical dopaminergic wiring and integration with amygdalar  
569 nuclei (Cunningham et al., 2008; Kalsbeek et al., 1988; Kroon et al., 2019; Yuan et al., 2021),  
570 producing lasting changes in excitability and functional properties of these networks  
571 (Muhammad et al., 2012; Zhang, 2004). Thus, for these ELS animals whose stress experience  
572 happened during this critical developmental window, functional responses of these neurons may  
573 not mirror those in neurotypical individuals. Indeed, the robust and consistent increase in  
574 excitability in these neurons suggests that for ELS animals, the typical relationship between  
575 greater excitability and faster extinction seen in neurotypical controls no longer holds.



## ELS IMPAIRS vmPFC FEAR ENCODING

576           These observations argue against an interpretation of ELS inducing a hypofrontal state  
577 where extinction of threats are unable to be extinguished by descending prefrontal networks.  
578 This outcome would be consistent with some prior work showing decreased activity in human  
579 populations during reward and risk processing (Birn et al., 2017), and frankly with our *a priori*  
580 predictions for this study. However, the increased excitability suggests instead that vmPFC  
581 neurons are appropriately responding to the threat posed by the CS+ cue and are appropriately  
582 increasing activity to drive extinction, but that this activity is not sufficient to dampen fear-  
583 induced suppression as in controls. A possible interpretation for this set of results is that  
584 extinction is a process that requires both new learning (CS+ no longer predicts threat) as well as  
585 feedback to stamp in those new associations. Recent findings and models are consistent with the  
586 importance of these potential feedback mechanisms to the PFC in normal fear learning and  
587 extinction (McNally et al., 2011). For example, during processing of fear stimuli, mesocortical  
588 dopaminergic input to the PFC (Vander Weele et al., 2018) as well as amygdalar input (Burgos-  
589 Robles et al., 2017) provide event-related information about fear threats to prefrontal networks.  
590 Indeed, recent work has demonstrated that pathway-specific inputs from intercalated neurons in  
591 the basolateral amygdala to discrete components of dorsal and ventral PFC may differentially  
592 regulate feedback to gate continued fear or its extinction (Hagihara et al., 2021). If this is the  
593 case, then persistent increases in fear-associated excitability in vmPFC of ELS animals may not  
594 be due to an inability to detect threats, but rather for a PFC-amygdala network to cooperatively  
595 use error-related feedback to update cues to a new and less-threatening state. If so, then evidence  
596 should exist that ELS animals are missing arising information that could be relevant for this  
597 learning.

## ELS IMPAIRS vmPFC FEAR ENCODING

598 Consistent with this interpretation, LFPs in the high gamma band were largely abolished  
599 in ELS compared to controls. LFPs reflect aggregate voltage in a region, and given the density of  
600 dendritic arbors relative to somas, these changes in voltages in a region may be biased towards  
601 reflecting afferent inputs to a region, via depolarization and hyperpolarization of dendrites  
602 receiving those signals. Support for this perspective was recently provided in models of calcium  
603 transient activity with GCaMP sensors in the dorsal striatum (Legaria et al., 2021). Given this,  
604 one hypothesis consistent with our data is that vmPFC in ELS animals is lacking relevant  
605 feedback on the efficacy of extinction learning, and this information may be provided via gamma  
606 band oscillations.

607 This loss may be important for several reasons for interpreting our results. First, gamma  
608 oscillations have been thought to reflect in part the activity of GABAergic interneurons (Buzsáki  
609 and Wang, 2012; Cho et al., 2020; Sohal et al., 2009), and thus the ELS neurons displaying a  
610 heightened excitability in this study may reflect the loss of this GABAergic regulation.  
611 Compellingly, BLA afferents preferentially target PFC GABA interneurons during early  
612 postnatal development (Cunningham et al., 2008), suggesting these pathways may be particularly  
613 vulnerable to insult during early life. Furthermore, disruption of this pathway during early life  
614 development appears to functionally alter and impair these arising BLA-PFC pathways, well-  
615 characterized dysfunction of this pathway in ELS individuals and animal models (Fan et al.,  
616 2014; Guadagno et al., 2018; Ishikawa et al., 2015; VanTieghem and Tottenham, 2018). Another  
617 potential source of input may arise from the hippocampus, which has likewise been implicated in  
618 fear-related changes in behavior in ELS-experienced animals (Reincke and Hanganu-Opatz,  
619 2017). Consistent with this interpretation, high-gamma electrical stimulations in the fimbria-fornix  
620 preferentially enhanced coordination between PFC and hippocampus, suggesting a likely route of

## ELS IMPAIRS vmPFC FEAR ENCODING

621 communication on this frequency (Helbing and Angenstein, 2020). Future investigations will  
622 need to investigate these pathways, and in particular, why this frequency is uniquely disrupted  
623 while others are relatively unaffected.

624 Finally, recent work has focused not only on responses to threats, but also how animals  
625 come to learn about stimuli explicitly predictive of no-threat (i.e., safety). For our task, the CS-  
626 cue served as a neutral stimulus without consequence, but also signaled the explicit absence of  
627 any possibility of shock. This information about this safe cue appears to be reflected quite  
628 differentially in the vmPFC of ELS and Control subjects. In general, vmPFC neurons in Controls  
629 did surprisingly worse at discriminating between the CS+ and CS- than in ELS animals. While  
630 both ELS and Controls were adequate at discriminating between CS+ and CS- stimuli, this was  
631 not the case in inhibitory responses. Controls only showed discrimination between CS+ and CS-  
632 on the third day of fear extinction, while ELS animals showed robust and reliable discrimination  
633 between the CS+ and CS- throughout all days of extinction. These findings suggest the  
634 possibility that ELS animals may be more vigilant and ascribe a greater salience to potentially  
635 threatening stimuli, while therefore also better able to ascribe safety to non-threatening cues in  
636 the same context. This interpretation suggests that separate signals and neurons in the vmPFC  
637 may participate in the detection and significance of threat cues and their extinction (excitatory  
638 responses), while another participates in the learned safety of explicitly neutral stimuli  
639 (inhibitory responses). In this sense, ELS neurons were relatively impaired relative to Controls in  
640 excitatory signaling about threats and extinction, while they were relatively enhanced relative to  
641 controls in inhibitory signaling about safety signals. This intriguing dichotomy suggests discrete  
642 pathways that may coordinate complex responses to environments with ambiguous and  
643 competing information.

644 In conclusion, these data demonstrate that ELS is a potent modulator of brain networks  
645 that are essential for mediating appropriate and adaptive responses to a host of cognitive tasks  
646 including relief from fear, abstinence from drugs of abuse, and adequate assessment of risk in  
647 decision making. ELS experience, particularly early in development while the PFC and its limbic  
648 network are still in the process of developing functional connectivity, can have lasting effects on  
649 stimulus processing and behavioral responses to motivational stimuli. These data present new  
650 insights into how ELS-related dysfunction may contribute to the wide variety of mental health  
651 disorders that are precipitated by ELS and contribute to risk factors for disorders like addiction  
652 and PTSD.

### 653 **Limitations**

654 While this work presents new and potentially important discoveries, it nevertheless has  
655 many limitations which constrain the interpretation of the results. First and foremost, the design  
656 of the ELS experience was not designed a priori as an early life stress model. As noted, the  
657 animals were originally destined for another project and due to new animal procedures in a new  
658 vivarium, the stressors that were presented were due to an unfortunate accident with animal  
659 water packs that produced cage flooding during a critical development period. We were unsure  
660 whether this experience would alter the brains of the affected litters, and as such, we felt they  
661 were not sufficiently neurotypical for use as normal controls. Rather than sacrifice those litters,  
662 we opted to keep and observe into adulthood. We are aware that there are different and more  
663 standard ELS models of limited bedding, fragmented maternal care and others which have more  
664 extensive use in the field (Molet et al., 2014). We look forward to being able to use these more  
665 established models in the future to bring our observations into better alignment with those  
666 procedures.

## ELS IMPAIRS vmPFC FEAR ENCODING

667           Another significant limitation of this study was the lack of use of cross-fostering in  
668 maternal care. Cohort effects from individual litters (such as unique features of maternal care or  
669 parental genetics) as distinct from the ELS experience itself could contribute to the differences  
670 seen here. Furthermore, we did not cull the litters to a set size. For example, dams with larger  
671 litters may need to expend more energy and therefore create more scarcity for the pups than  
672 dams with smaller litters. As noted above, the experimental procedure was not designed with  
673 these important consideration in mind, and future studies will need to account for these features.

674           A third limitation is the low number of male subjects that we were able to record from in  
675 adulthood. As noted in the methods, most of the males in were accidentally sacrificed prior to  
676 adulthood due to mislabeling, though the female subjects were left intact. As such, the  
677 unbalanced number of animals biased towards female subjects were pooled with the small  
678 number of male subjects for analysis. In future studies, better-powered populations of males and  
679 females would be valuable to tease apart ELS contributions to male and female development and  
680 fear learning.

681

682

683 **Works Cited**

- 684 Adhikari, A., Lerner, T.N., Finkelstein, J., Pak, S., Jennings, J.H., Davidson, T.J., Ferenczi, E.,  
685 Gunaydin, L.A., Mirzabekov, J.J., Ye, L., Kim, S.-Y., Lei, A., Deisseroth, K., 2015.  
686 Basomedial amygdala mediates top-down control of anxiety and fear. *Nature* 527, 179–  
687 185. <https://doi.org/10.1038/nature15698>
- 688 Birn, R.M., Roeber, B.J., Pollak, S.D., 2017. Early childhood stress exposure, reward pathways,  
689 and adult decision making. *Proc. Natl. Acad. Sci. U. S. A.* 114, 13549–13554.  
690 <https://doi.org/10.1073/pnas.1708791114>
- 691 Brady, K.T., Sinha, R., 2005. Co-Occurring Mental and Substance Use Disorders: The  
692 Neurobiological Effects of Chronic Stress. *Am. J. Psychiatry* 162, 1483–1493.  
693 <https://doi.org/10.1176/appi.ajp.162.8.1483>
- 694 Brown, T.A., Barlow, D.H., 1992. Comorbidity among anxiety disorders: Implications for  
695 treatment and DSM-IV. *J. Consult. Clin. Psychol.* 60, 835–844.  
696 <https://doi.org/10.1037/0022-006X.60.6.835>
- 697 Bukalo, O., Nonaka, M., Weinholtz, C.A., Mendez, A., Taylor, W.W., Holmes, A., 2021. Effects  
698 of optogenetic photoexcitation of infralimbic cortex inputs to the basolateral amygdala on  
699 conditioned fear and extinction. *Behav. Brain Res.* 396, 112913.  
700 <https://doi.org/10.1016/j.bbr.2020.112913>
- 701 Burgos-Robles, A., Kimchi, E.Y., Izadmehr, E.M., Porzenheim, M.J., Ramos-Guasp, W.A.,  
702 Nieh, E.H., Felix-Ortiz, A.C., Namburi, P., Leppla, C.A., Presbrey, K.N., Anandalingam,  
703 K.K., Pagan-Rivera, P.A., Anahtar, M., Beyeler, A., Tye, K.M., 2017. Amygdala inputs  
704 to prefrontal cortex guide behavior amid conflicting cues of reward and punishment. *Nat.*  
705 *Neurosci.* 20, 824–835. <https://doi.org/10.1038/nn.4553>
- 706 Buzsáki, G., Wang, X.-J., 2012. Mechanisms of gamma oscillations. *Annu. Rev. Neurosci.* 35,  
707 203–225. <https://doi.org/10.1146/annurev-neuro-062111-150444>
- 708 Carr, C.P., Martins, C.M.S., Stingel, A.M., Lemgruber, V.B., Juruena, M.F., 2013. The Role of  
709 Early Life Stress in Adult Psychiatric Disorders: A Systematic Review According to  
710 Childhood Trauma Subtypes. *J. Nerv. Ment. Dis.* 201, 1007–1020.  
711 <https://doi.org/10.1097/NMD.0000000000000049>
- 712 Cho, K.K.A., Davidson, T.J., Bouvier, G., Marshall, J.D., Schnitzer, M.J., Sohal, V.S., 2020.  
713 Cross-hemispheric gamma synchrony between prefrontal parvalbumin interneurons  
714 supports behavioral adaptation during rule shift learning. *Nat. Neurosci.* 23, 892–902.  
715 <https://doi.org/10.1038/s41593-020-0647-1>
- 716 Cunningham, M.G., Bhattacharyya, S., Benes, F.M., 2008. Increasing Interaction of amygdalar  
717 afferents with GABAergic interneurons between birth and adulthood. *Cereb. Cortex N.*  
718 *Y. N* 1991 18, 1529–1535. <https://doi.org/10.1093/cercor/bhm183>
- 719 Dube, S.R., Felitti, V.J., Dong, M., Chapman, D.P., Giles, W.H., Anda, R.F., 2003. Childhood  
720 abuse, neglect, and household dysfunction and the risk of illicit drug use: the adverse  
721 childhood experiences study. *Pediatrics* 111, 564–572.
- 722 Enoch, M.-A., 2011. The Role of Early Life Stress as a Predictor for Alcohol and Drug  
723 Dependence. *Psychopharmacology (Berl.)* 214, 17–31. <https://doi.org/10.1007/s00213-010-1916-6>
- 724
- 725 Fan, Y., Herrera-Melendez, A.L., Pestke, K., Feeser, M., Aust, S., Otte, C., Pruessner, J.C.,  
726 Böker, H., Bajbouj, M., Grimm, S., 2014. Early life stress modulates amygdala-prefrontal

- 727 functional connectivity: implications for oxytocin effects. *Hum. Brain Mapp.* 35, 5328–  
728 5339. <https://doi.org/10.1002/hbm.22553>
- 729 Giustino, T.F., Maren, S., 2015. The Role of the Medial Prefrontal Cortex in the Conditioning  
730 and Extinction of Fear. *Front. Behav. Neurosci.* 9, 298.  
731 <https://doi.org/10.3389/fnbeh.2015.00298>
- 732 Greenberg, T., Carlson, J.M., Cha, J., Hajcak, G., Mujica-Parodi, L.R., 2013. Ventromedial  
733 prefrontal cortex reactivity is altered in generalized anxiety disorder during fear  
734 generalization. *Depress. Anxiety* 30, 242–250. <https://doi.org/10.1002/da.22016>
- 735 Guadagno, A., Kang, M.S., Devenyi, G.A., Mathieu, A.P., Rosa-Neto, P., Chakravarty, M.,  
736 Walker, C.-D., 2018. Reduced resting-state functional connectivity of the basolateral  
737 amygdala to the medial prefrontal cortex in preweaning rats exposed to chronic early-life  
738 stress. *Brain Struct. Funct.* 223, 3711–3729. <https://doi.org/10.1007/s00429-018-1720-3>
- 739 Gutman, A.L., Nett, K.E., Cosme, C.V., Worth, W.R., Gupta, S.C., Wemmie, J.A., LaLumiere,  
740 R.T., 2017. The extinction of cocaine seeking requires a window of infralimbic pyramidal  
741 neuron activity after unreinforced lever presses. *J. Neurosci.* 3821–16.  
742 <https://doi.org/10.1523/JNEUROSCI.3821-16.2017>
- 743 Hagihara, K.M., Bukalo, O., Zeller, M., Aksoy-Aksel, A., Karalis, N., Limoges, A., Rigg, T.,  
744 Campbell, T., Mendez, A., Weinholtz, C., Mahn, M., Zweifel, L.S., Palmiter, R.D.,  
745 Ehrlich, I., Lüthi, A., Holmes, A., 2021. Intercalated amygdala clusters orchestrate a  
746 switch in fear state. *Nature*. <https://doi.org/10.1038/s41586-021-03593-1>
- 747 Helbing, C., Angenstein, F., 2020. Frequency-dependent electrical stimulation of fimbria-fornix  
748 preferentially affects the mesolimbic dopamine system or prefrontal cortex. *Brain*  
749 *Stimulat.* 13, 753–764. <https://doi.org/10.1016/j.brs.2020.02.026>
- 750 Herlenius, E., Lagercrantz, H., 2004. Development of neurotransmitter systems during critical  
751 periods. *Exp. Neurol.* 190 Suppl 1, S8-21.  
752 <https://doi.org/10.1016/j.expneurol.2004.03.027>
- 753 Ishikawa, J., Nishimura, R., Ishikawa, A., 2015. Early-life stress induces anxiety-like behaviors  
754 and activity imbalances in the medial prefrontal cortex and amygdala in adult rats. *Eur. J.*  
755 *Neurosci.* 41, 442–453. <https://doi.org/10.1111/ejn.12825>
- 756 Jackson, D.C., Mueller, C.J., Dolski, I., Dalton, K.M., Nitschke, J.B., Urry, H.L., Rosenkranz,  
757 M.A., Ryff, C.D., Singer, B.H., Davidson, R.J., 2016. Now You Feel It, Now You Don't:  
758 Frontal Brain Electrical Asymmetry and Individual Differences in Emotion Regulation.  
759 *Psychol. Sci.*
- 760 Kalsbeek, A., Voorn, P., Buijs, R.M., Pool, C.W., Uylings, H.B., 1988. Development of the  
761 dopaminergic innervation in the prefrontal cortex of the rat. *J. Comp. Neurol.* 269, 58–72.  
762 <https://doi.org/10.1002/cne.902690105>
- 763 Kim, S.C., Jo, Y.S., Kim, I.H., Kim, H., Choi, J.-S., 2010. Lack of medial prefrontal cortex  
764 activation underlies the immediate extinction deficit. *J. Neurosci. Off. J. Soc. Neurosci.*  
765 30, 832–837. <https://doi.org/10.1523/JNEUROSCI.4145-09.2010>
- 766 Kroon, T., van Hugel, E., van Linge, L., Mansvelder, H.D., Meredith, R.M., 2019. Early  
767 postnatal development of pyramidal neurons across layers of the mouse medial prefrontal  
768 cortex. *Sci. Rep.* 9, 5037. <https://doi.org/10.1038/s41598-019-41661-9>
- 769 Laubach, M., Amarante, L.M., Swanson, K., White, S.R., 2018. What, If Anything, Is Rodent  
770 Prefrontal Cortex? *eNeuro* 5. <https://doi.org/10.1523/ENEURO.0315-18.2018>

ELS IMPAIRS vmPFC FEAR ENCODING

- 771 Laurent, V., Westbrook, R.F., 2009. Inactivation of the infralimbic but not the prelimbic cortex  
772 impairs consolidation and retrieval of fear extinction. *Learn. Mem. Cold Spring Harb. N*  
773 *16*, 520–529. <https://doi.org/10.1101/lm.1474609>
- 774 Legaria, A.A., Licholai, J.A., Kravitz, A.V., 2021. Fiber photometry does not reflect spiking  
775 activity in the striatum. *bioRxiv* 2021.01.20.427525.  
776 <https://doi.org/10.1101/2021.01.20.427525>
- 777 Lupien, S.J., McEwen, B.S., Gunnar, M.R., Heim, C., 2009. Effects of stress throughout the  
778 lifespan on the brain, behaviour and cognition. *Nat. Rev. Neurosci.* *10*, 434–445.  
779 <https://doi.org/10.1038/nrn2639>
- 780 Maren, S., Quirk, G.J., 2004. Neuronal signalling of fear memory. *Nat. Rev. Neurosci.* *5*, 844–  
781 852. <https://doi.org/10.1038/nrn1535>
- 782 McEwen, B.S., 2003. Early life influences on life-long patterns of behavior and health. *Ment.*  
783 *Retard. Dev. Disabil. Res. Rev.* *9*, 149–154. <https://doi.org/10.1002/mrdd.10074>
- 784 McNally, G.P., Johansen, J.P., Blair, H.T., 2011. Placing prediction into the fear circuit. *Trends*  
785 *Neurosci.* *34*, 283–292. <https://doi.org/10.1016/j.tins.2011.03.005>
- 786 Milad, M.R., Pitman, R.K., Ellis, C.B., Gold, A.L., Shin, L.M., Lasko, N.B., Zeidan, M.A.,  
787 Handwerker, K., Orr, S.P., Rauch, S.L., 2009. Neurobiological Basis of Failure to Recall  
788 Extinction Memory in Posttraumatic Stress Disorder. *Biol. Psychiatry* *66*, 1075–1082.  
789 <https://doi.org/10.1016/j.biopsych.2009.06.026>
- 790 Milad, M.R., Quirk, G.J., 2002. Neurons in medial prefrontal cortex signal memory for fear  
791 extinction. *Nature* *420*, 70–74. <https://doi.org/10.1038/nature01138>
- 792 Molet, J., Maras, P.M., Avishai-Eliner, S., Baram, T.Z., 2014. Naturalistic rodent models of  
793 chronic early-life stress. *Dev. Psychobiol.* *56*, 1675–1688.  
794 <https://doi.org/10.1002/dev.21230>
- 795 Muhammad, A., Carroll, C., Kolb, B., 2012. Stress during development alters dendritic  
796 morphology in the nucleus accumbens and prefrontal cortex. *Neuroscience* *216*, 103–109.  
797 <https://doi.org/10.1016/j.neuroscience.2012.04.041>
- 798 Myers-Schulz, B., Koenigs, M., 2012. Functional anatomy of ventromedial prefrontal cortex:  
799 implications for mood and anxiety disorders. *Mol. Psychiatry* *17*, 132–141.  
800 <https://doi.org/10.1038/mp.2011.88>
- 801 Nisar, S., Farooq, R.K., Nazir, S., Alamoudi, W., Alhibshi, A., 2019. Exposure to early life  
802 adversity alters the future behavioral response to a stressful challenge in BALB/C mice.  
803 *Physiol. Behav.* *210*, 112622. <https://doi.org/10.1016/j.physbeh.2019.112622>
- 804 Oldham Green, N., Maniam, J., Riese, J., Morris, M.J., Voineagu, I., 2021. Transcriptomic  
805 signature of early life stress in male rat prefrontal cortex. *Neurobiol. Stress* *14*.  
806 <https://doi.org/10.1016/j.ynstr.2021.100316>
- 807 Quirk, G.J., Mueller, D., 2008. Neural mechanisms of extinction learning and retrieval.  
808 *Neuropsychopharmacol. Off. Publ. Am. Coll. Neuropsychopharmacol.* *33*, 56–72.  
809 <https://doi.org/10.1038/sj.npp.1301555>
- 810 Regier, D.A., Farmer, M.E., Rae, D.S., Locke, B.Z., Keith, S.J., Judd, L.L., Goodwin, F.K.,  
811 1990. Comorbidity of Mental Disorders With Alcohol and Other Drug Abuse: Results  
812 From the Epidemiologic Catchment Area (ECA) Study. *JAMA* *264*, 2511–2518.  
813 <https://doi.org/10.1001/jama.1990.03450190043026>
- 814 Reincke, S.A.J., Hanganu-Opatz, I.L., 2017. Early-life stress impairs recognition memory and  
815 perturbs the functional maturation of prefrontal-hippocampal-perirhinal networks. *Sci.*  
816 *Rep.* *7*, 42042. <https://doi.org/10.1038/srep42042>



- 817 Rice, D., Barone, S., 2000. Critical periods of vulnerability for the developing nervous system:  
818 evidence from humans and animal models. *Environ. Health Perspect.* 108 Suppl 3, 511–  
819 533.
- 820 Shin, L.M., Orr, S.P., Carson, M.A., Rauch, S.L., Macklin, M.L., Lasko, N.B., Peters, P.M.,  
821 Metzger, L.J., Dougherty, D.D., Cannistraro, P.A., Alpert, N.M., Fischman, A.J., Pitman,  
822 R.K., 2004. Regional cerebral blood flow in the amygdala and medial prefrontal cortex  
823 during traumatic imagery in male and female Vietnam veterans with PTSD. *Arch. Gen.*  
824 *Psychiatry* 61, 168–176. <https://doi.org/10.1001/archpsyc.61.2.168>
- 825 Sierra-Mercado, D., Padilla-Coreano, N., Quirk, G.J., 2011a. Dissociable Roles of Prelimbic and  
826 Infralimbic Cortices, Ventral Hippocampus, and Basolateral Amygdala in the Expression  
827 and Extinction of Conditioned Fear. *Neuropsychopharmacology* 36, 529–538.  
828 <https://doi.org/10.1038/npp.2010.184>
- 829 Sierra-Mercado, D., Padilla-Coreano, N., Quirk, G.J., 2011b. Dissociable roles of prelimbic and  
830 infralimbic cortices, ventral hippocampus, and basolateral amygdala in the expression  
831 and extinction of conditioned fear. *Neuropsychopharmacol. Off. Publ. Am. Coll.*  
832 *Neuropsychopharmacol.* 36, 529–538. <https://doi.org/10.1038/npp.2010.184>
- 833 Sohal, V.S., Zhang, F., Yizhar, O., Deisseroth, K., 2009. Parvalbumin neurons and gamma  
834 rhythms enhance cortical circuit performance. *Nature* 459, 698–702.  
835 <https://doi.org/10.1038/nature07991>
- 836 Taylor, S.E., 2010. Mechanisms linking early life stress to adult health outcomes. *Proc. Natl.*  
837 *Acad. Sci.* 107, 8507–8512. <https://doi.org/10.1073/pnas.1003890107>
- 838 Toda, H., Boku, S., Nakagawa, S., Inoue, T., Kato, A., Takamura, N., Song, N., Nibuya, M.,  
839 Koyama, T., Kusumi, I., 2014. Maternal separation enhances conditioned fear and  
840 decreases the mRNA levels of the neurotensin receptor 1 gene with hypermethylation of  
841 this gene in the rat amygdala. *PloS One* 9, e97421.  
842 <https://doi.org/10.1371/journal.pone.0097421>
- 843 Torres-Berrío, A., Issler, O., Parise, E.M., Nestler, E.J., 2019. Unraveling the epigenetic  
844 landscape of depression: focus on early life stress. *Dialogues Clin. Neurosci.* 21, 341–  
845 357. <https://doi.org/10.31887/DCNS.2019.21.4/enestler>
- 846 Vander Weele, C.M., Siciliano, C.A., Matthews, G.A., Namburi, P., Izadmehr, E.M., Espinel,  
847 I.C., Nieh, E.H., Schut, E.H.S., Padilla-Coreano, N., Burgos-Robles, A., Chang, C.-J.,  
848 Kimchi, E.Y., Beyeler, A., Wichmann, R., Wildes, C.P., Tye, K.M., 2018. Dopamine  
849 enhances signal-to-noise ratio in cortical-brainstem encoding of aversive stimuli. *Nature*  
850 563, 397–401. <https://doi.org/10.1038/s41586-018-0682-1>
- 851 VanTieghem, M.R., Tottenham, N., 2018. Neurobiological Programming of Early Life Stress:  
852 Functional Development of Amygdala-Prefrontal Circuitry and Vulnerability for Stress-  
853 Related Psychopathology. *Curr. Top. Behav. Neurosci.* 38, 117–136.  
854 [https://doi.org/10.1007/7854\\_2016\\_42](https://doi.org/10.1007/7854_2016_42)
- 855 Vogt, D., Waeldin, S., Hellhammer, D., Meinlschmidt, G., 2016. The role of early adversity and  
856 recent life stress in depression severity in an outpatient sample. *J. Psychiatr. Res.* 83, 61–  
857 70. <https://doi.org/10.1016/j.jpsychires.2016.08.007>
- 858 Walker, C.-D., Bath, K.G., Joels, M., Korosi, A., Larauche, M., Lucassen, P.J., Morris, M.J.,  
859 Raineke, C., Roth, T.L., Sullivan, R.M., Taché, Y., Baram, T.Z., 2017. Chronic early life  
860 stress induced by limited bedding and nesting (LBN) material in rodents: critical  
861 considerations of methodology, outcomes and translational potential. *Stress Amst. Neth.*  
862 20, 421–448. <https://doi.org/10.1080/10253890.2017.1343296>

## ELS IMPAIRS vmPFC FEAR ENCODING

- 863 Weinstock, M., 2017. Prenatal stressors in rodents: Effects on behavior. *Neurobiol. Stress*,  
864 SI:Stressors in animals 6, 3–13. <https://doi.org/10.1016/j.ynstr.2016.08.004>
- 865 Weinstock, M., 2008. The long-term behavioural consequences of prenatal stress. *Neurosci.*  
866 *Biobehav. Rev.*, The long-term consequences of stress on brain function: from adaptation  
867 to mental diseases 32, 1073–1086. <https://doi.org/10.1016/j.neubiorev.2008.03.002>
- 868 West, E.A., Niedringhaus, M., Ortega, H.K., Haake, R.M., Frohlich, F., Carelli, R.M., 2021.  
869 Noninvasive Brain Stimulation Rescues Cocaine-Induced Prefrontal Hypoactivity and  
870 Restores Flexible Behavior. *Biol. Psychiatry* 89, 1001–1011.  
871 <https://doi.org/10.1016/j.biopsych.2020.12.027>
- 872 Yuan, R., Nechvatal, J.M., Buckmaster, C.L., Ayash, S., Parker, K.J., Schatzberg, A.F., Lyons,  
873 D.M., Menon, V., 2021. Long-term effects of intermittent early life stress on primate  
874 prefrontal-subcortical functional connectivity. *Neuropsychopharmacol. Off. Publ. Am.*  
875 *Coll. Neuropsychopharmacol.* 46, 1348–1356. [https://doi.org/10.1038/s41386-021-](https://doi.org/10.1038/s41386-021-00956-0)  
876 [00956-0](https://doi.org/10.1038/s41386-021-00956-0)
- 877 Zhang, Z., 2004. Maturation of layer V pyramidal neurons in the rat prefrontal cortex: intrinsic  
878 properties and synaptic function. *J. Neurophysiol.* 91, 1171–1182.  
879 <https://doi.org/10.1152/jn.00855.2003>
- 880

881 Figure Legends

882

883 **Figure 1. A.** On PND6, weights of the ELS rats were lower than the unstressed Controls. **B.** In  
884 adulthood (PND180), ELS subjects showed less time (*left*) and fewer initiated contacts with a  
885 novel conspecific juvenile rat (*right*) in a JSI assessment. **C.** During Instrumental acquisition,  
886 rats in the ELS group showed similar levels of motivation to press as controls across decreasing  
887 schedules of reinforcement. **D.** In a conditioned suppression task, the fear-associated CS+ cue  
888 suppressed lever pressing for food (VI60) more in ELS rats than Controls across three days of  
889 fear extinction. \* $p < 0.05$ , main effect, ELS vs Control; # $p < 0.06$ , main effect, ELS vs Control;  
890 & $p < 0.05$ , ELS vs Control CS+ on that Day.

891

892 **Figure 2.** Placements of array wires in the PFC. Controls (black/gray circles) and ELS animals  
893 (red/orange circles) are shown primarily in the infralimbic cortex, with some wires extending  
894 ventrally into the medial orbital and dorsal peduncular cortex, and some dorsally into prelimbic  
895 cortex.

896

897 **Figure 3.** Heat plot representation of the population of recorded neural activity in the IL in  
898 Controls (**A**) and ELS subjects (**B**) relative to the onset of the CS+ cue in the Conditioned  
899 Suppression task. Color reflects magnitude of z-normalized firing with lighter colors indicating  
900 greater firing rates ( $z > 1$ ), while darker colors indicate inhibitory activity ( $z < 1$ ). Cells on the plot  
901 were sorted by the magnitude of the average firing rate during the first 1000ms after cue onset.  
902 Brackets on the left of each plot indicate the range of cells for which the phasic response was at  
903 least +0.5z above baseline (“excitatory”; *black top bracket*) or at least -0.5z below baseline  
904 (“inhibitory”; *gray bottom bracket*). Bar to the right of each heatplot indicates the scale to translate  
905 z score (from +4 to -4z) for each plot. **C.** Relative proportion of excitatory (EXC; greater than  
906 +0.5z), inhibitory (INH; less than -0.5z), and non-phasic units relative to the first 1sec of cue onset.  
907 ELS animals showed a significant increase in the proportion of EXC cells relative to Controls,  $\chi^2_1$   
908 = 10.96,  $p = 0.0009$

909

910 **Figure 4.** Phasic responses of vmPFC neurons to cue onset over repeated sessions of Conditioned  
911 Suppression. Identified excitatory (**A-B**) and inhibitory (**C-D**) units were analyzed separately. **A.**  
912 Both ELS (warm colors) and Control subjects (gray colors) showed rapid phasic responses to  
913 presentations of the fear-associated CS+ that typically lasted less than 1sec following cue onset.  
914 **B.** The average firing rate during the first 1sec following cue onset for each EXC cell for the CS+  
915 (solid line) and the CS- (dashed line). **C-D.** Same as for A-B, but for maximum inhibitions (lowest  
916 firing point). \* $p < 0.05$ , Control vs ELS (CS+); † $p < 0.05$ , CS+ vs CS- (Controls); ‡ $p < 0.05$ , CS+ vs  
917 CS- (ELS).

918

919 **Figure 5.** Perievent spectrograms generated for each of the frequencies identified in each title.  
920 Data are z-normalized by the average power in the baseline for each subject. At left in each  
921 subfigure is the mean response in 200ms bins over the duration of the CS+ cue presentations  
922 (Control: *black*; ELS: *red*). Vertical dotted line indicate cue onset and offset respectively. At right  
923 in each subfigure is the average (excluding the first 400ms, which may reflect a non-associative  
924 artifact). At left in black/gray are controls, and at right in red/pink are the ELS averages. In each  
925 pair, the darker/left bar is the CS+, while the lighter/right bar is the CS-. \* $p < 0.05$ , Control v ELS;  
926 § $p < 0.05$ , Baseline period vs Cue period; & $p < 0.05$ , CS+ vs CS-.

## ELS IMPAIRS vmPFC FEAR ENCODING

927 Figure 1.  
928

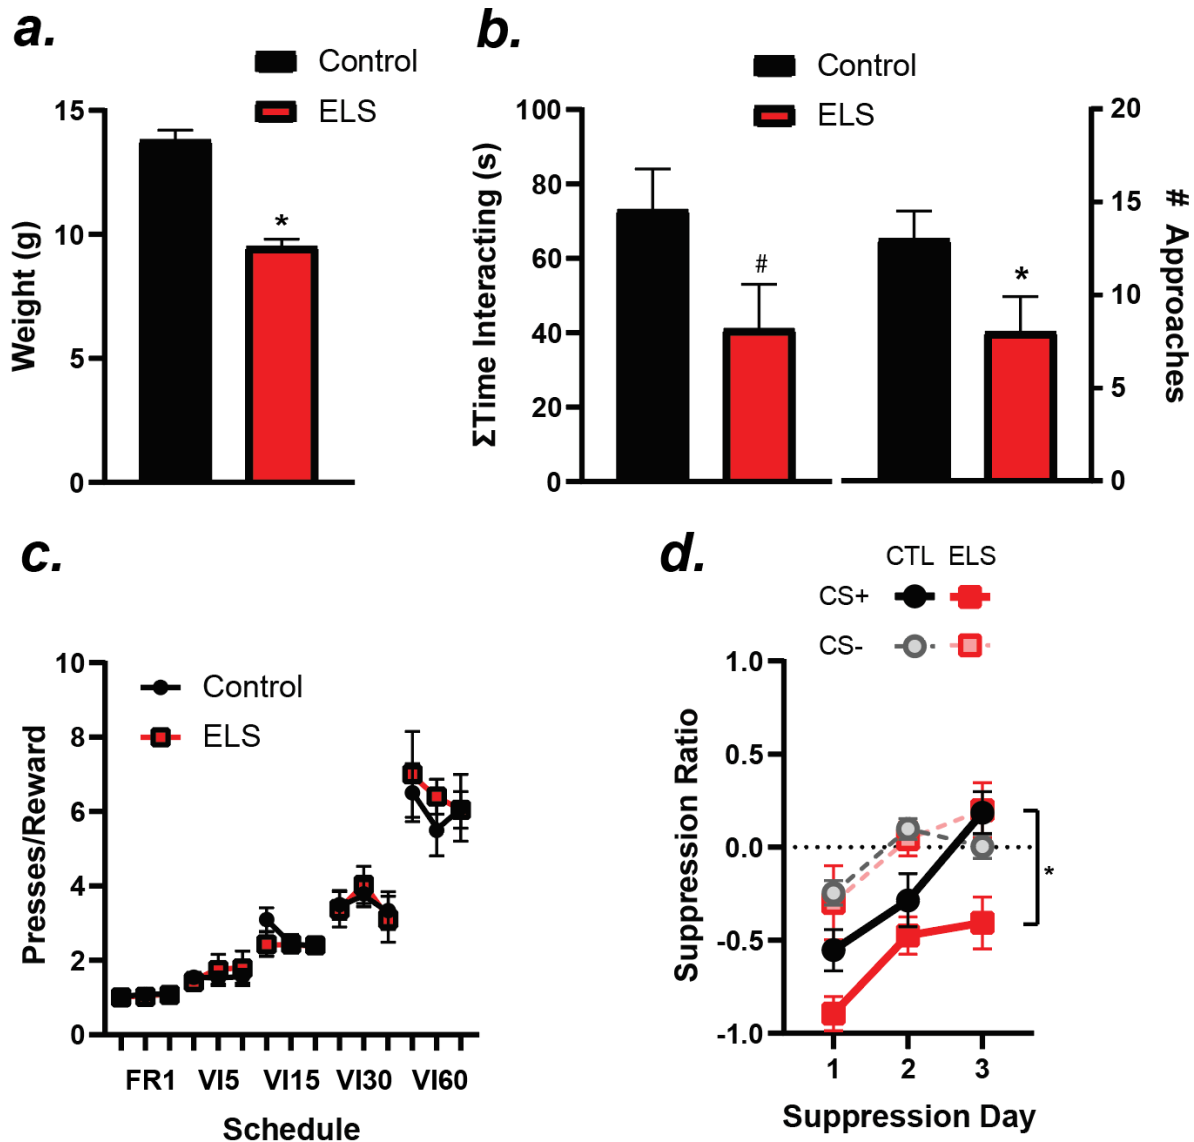

929  
930

## ELS IMPAIRS vmPFC FEAR ENCODING

931 Figure 2  
932  
933

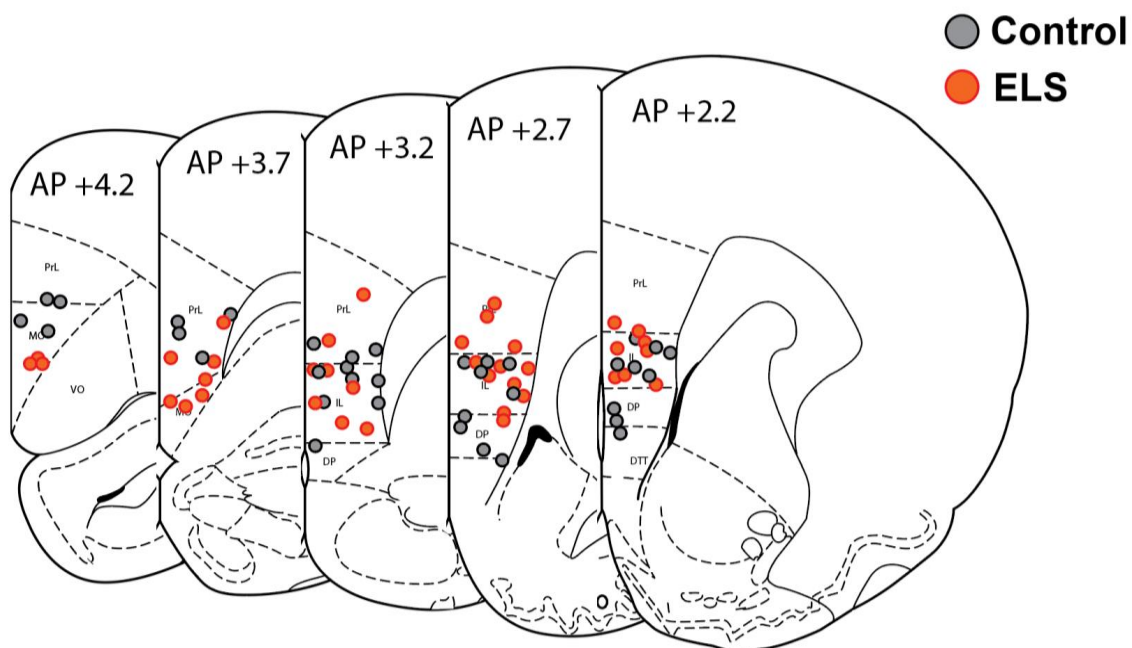

934  
935

## ELS IMPAIRS vmPFC FEAR ENCODING

936 Figure 3.  
937

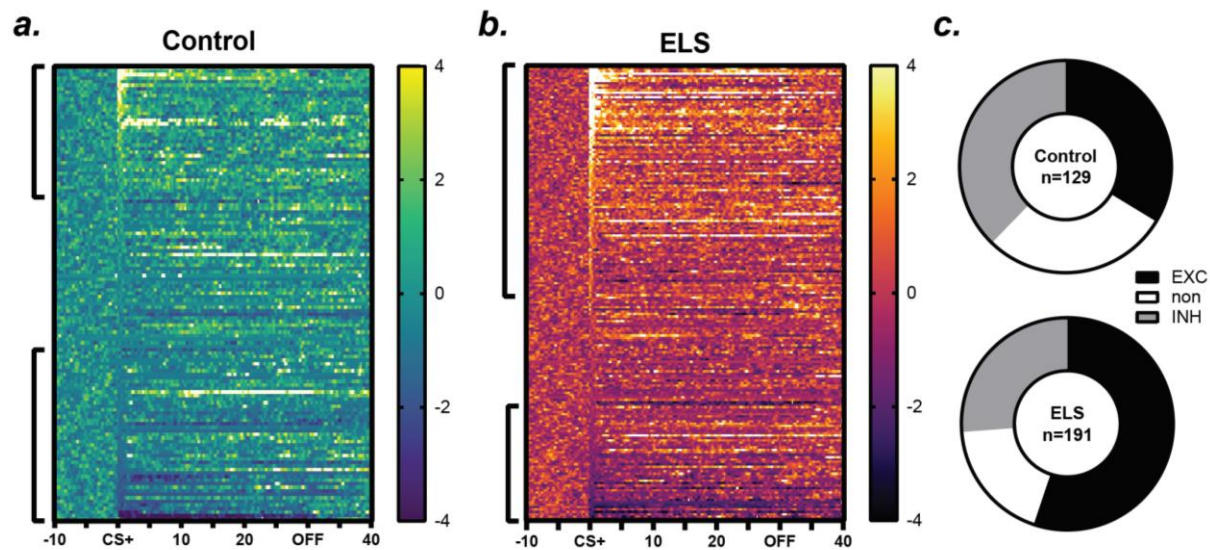

938  
939

ELS IMPAIRS vmPFC FEAR ENCODING

940 Figure 4.

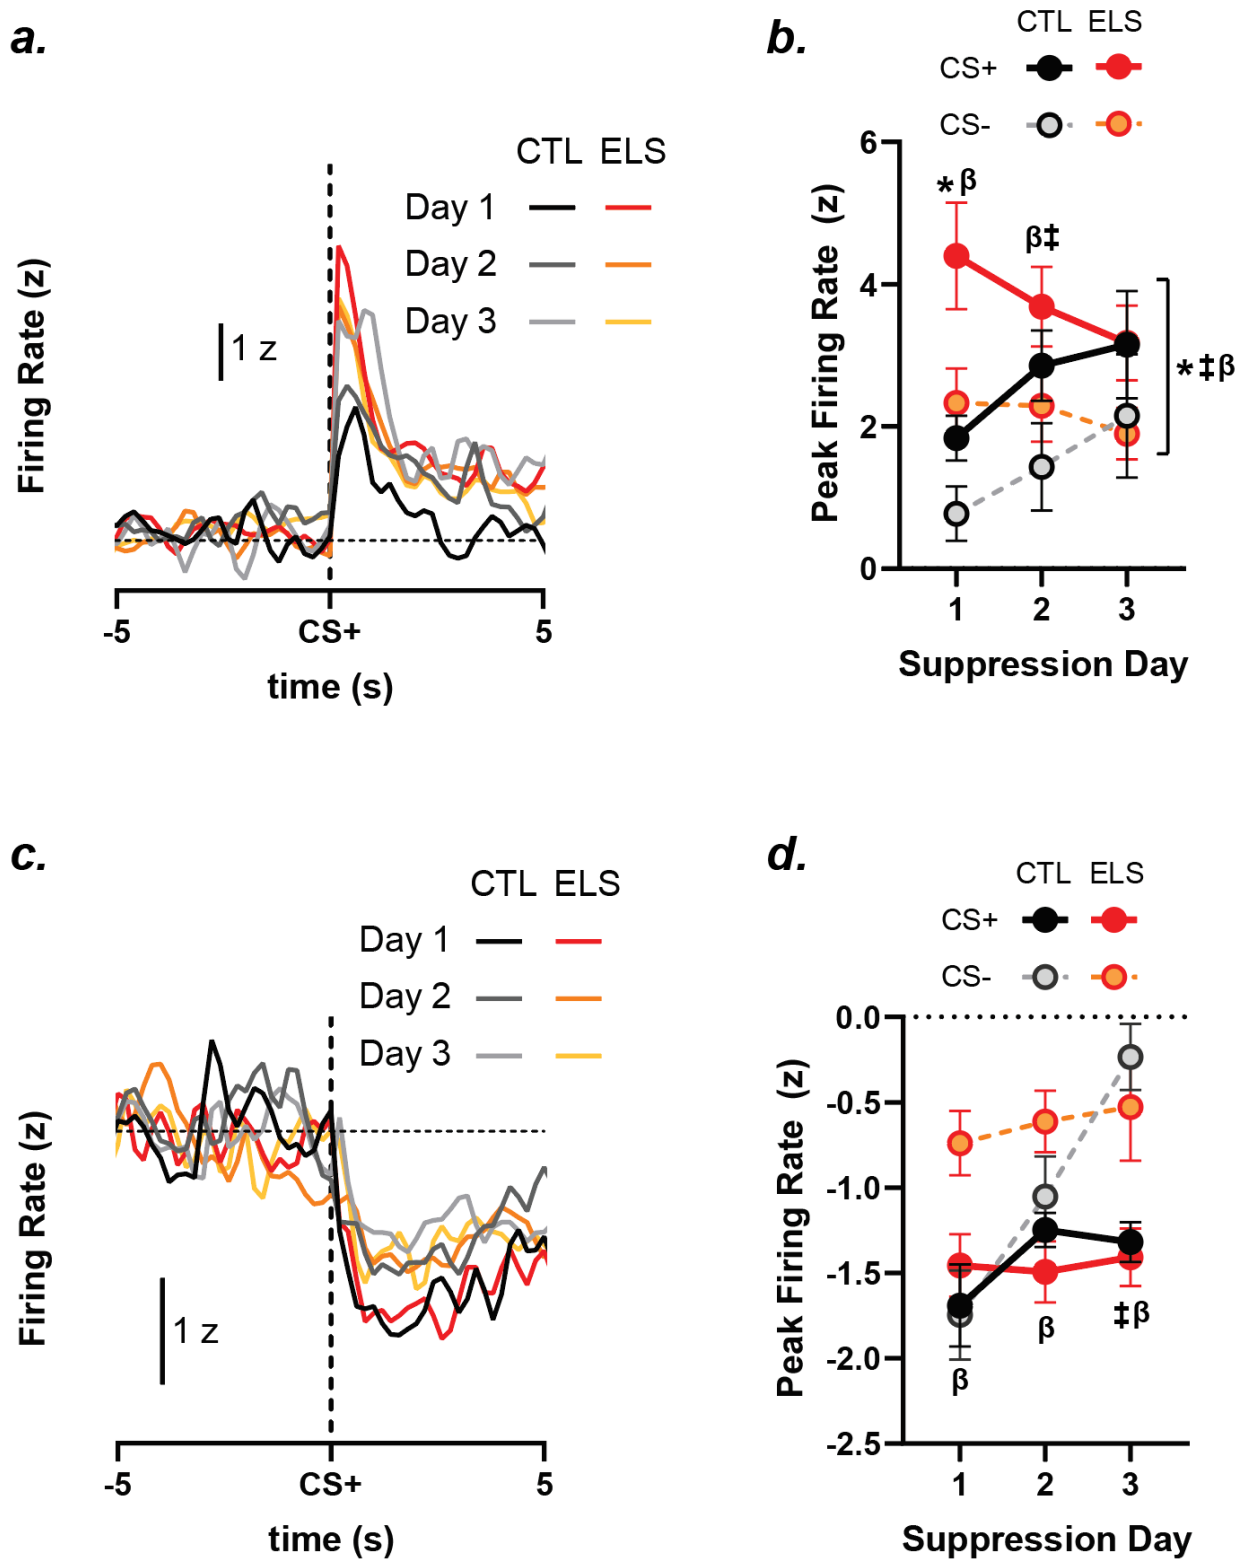

## ELS IMPAIRS vmPFC FEAR ENCODING

943 Figure 5.

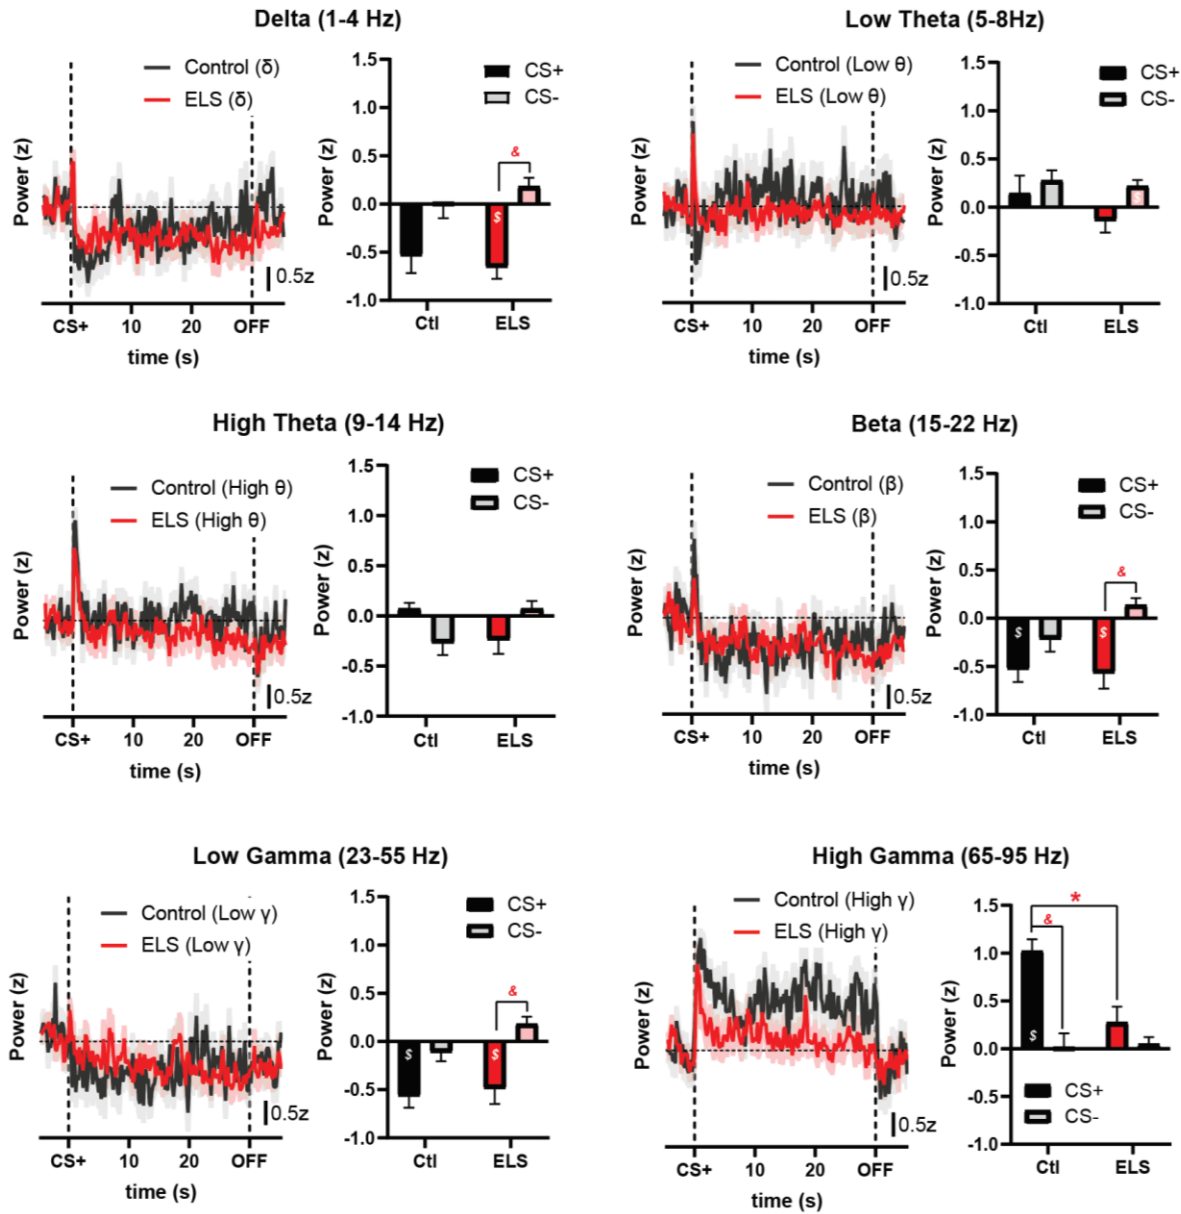

944  
945
